# Supplementary material for: Carbone stabilized B2 and B22+ – isoelectronic analogues to diborabutyne and diborabutatriene
Source: Royal Society of Chemistry journal article supplement (doi:10.1039/d3dt04358d), 2024-01-01
Supplement: d3dt04358d2.pdf [file d3dt04358d2.pdf]

**Supporting Information of**  
**Carbone Stabilized B<sub>2</sub> and B<sub>2</sub><sup>2+</sup> - Isoelectronic Analogues to**  
**Diborabutyne and Diborabutatriene**

Jishnu Sai Gopinath, Naseeha Vadakkathodika and Pattiyil Parameswaran\*

---

\* Department of Chemistry, National Institute of Technology Calicut, Kozhikode, Kerala, India  
– 673601, Email: [param@nitc.ac.in](mailto:param@nitc.ac.in)

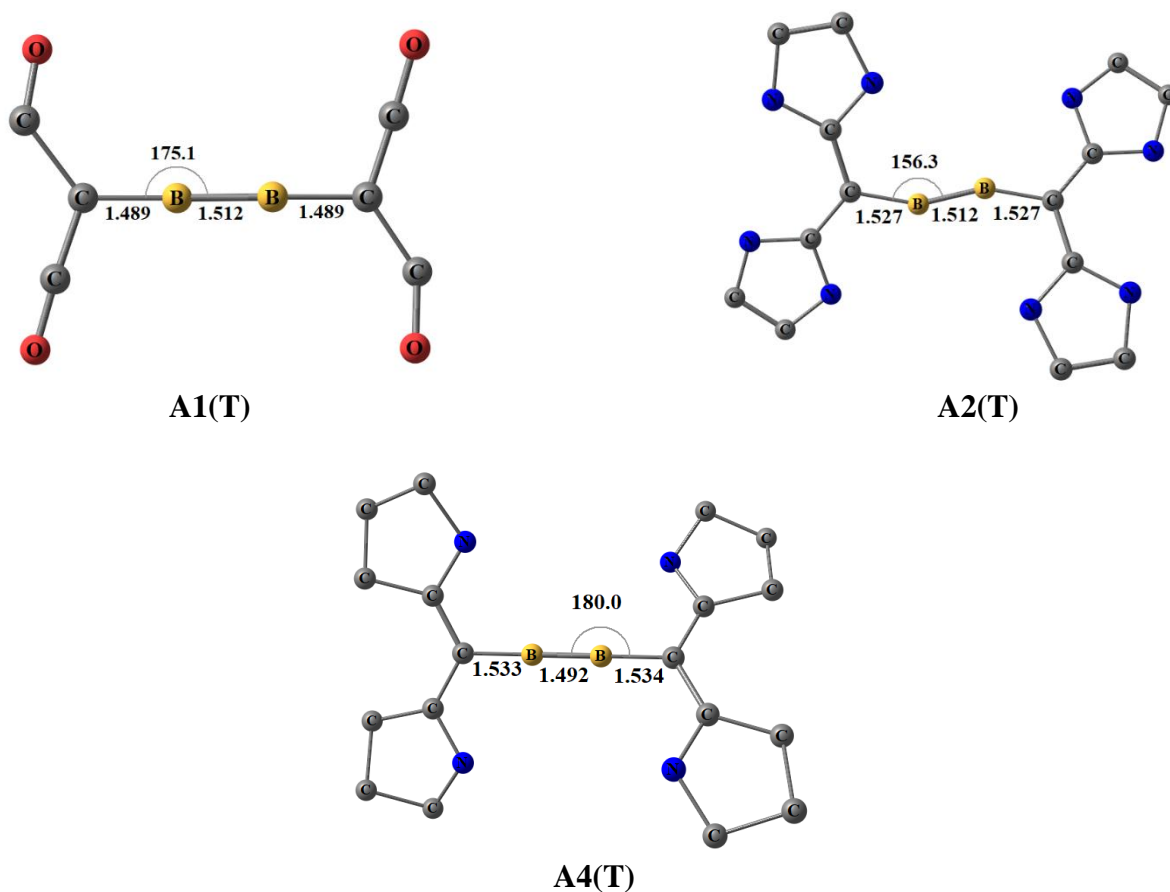

**Figure S1:** Optimized triplet geometries of **A1(T)**, **A2(T)** and **A4(T)** at BP86/def2-TZVPP level of theory. **A3(T)** was not able to get converged. Hydrogens are omitted for better view.

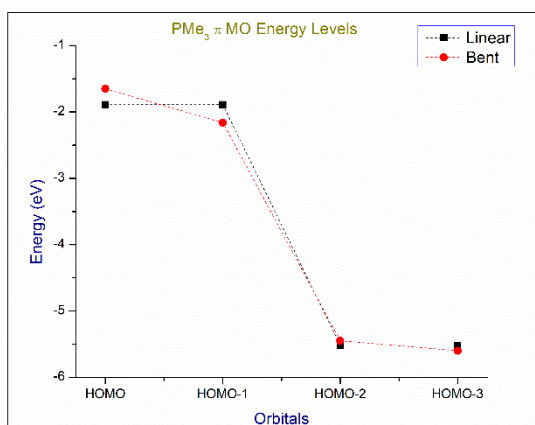

(a)

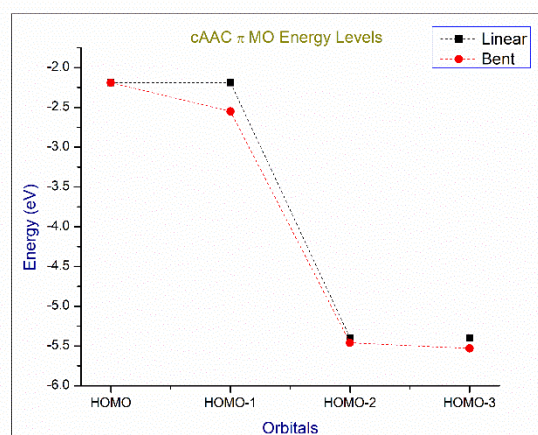

(b)

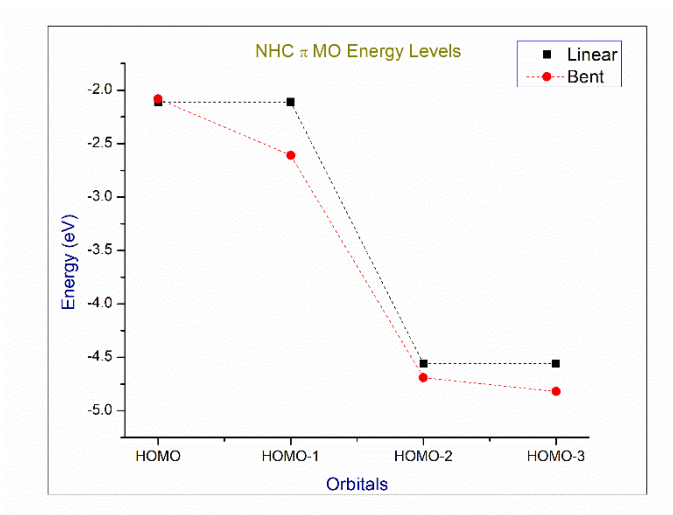

(c)

**Figure S2:** Energy variation in the  $\pi$  molecular orbitals of **A3** (a), **A4** (b) and **A2** (c) when structure changes from linear to bent. Energies are given in eV. Degenerate orbitals in **A3** are considered as HOMO and HOMO-1, and HOMO-2 and HOMO-3.

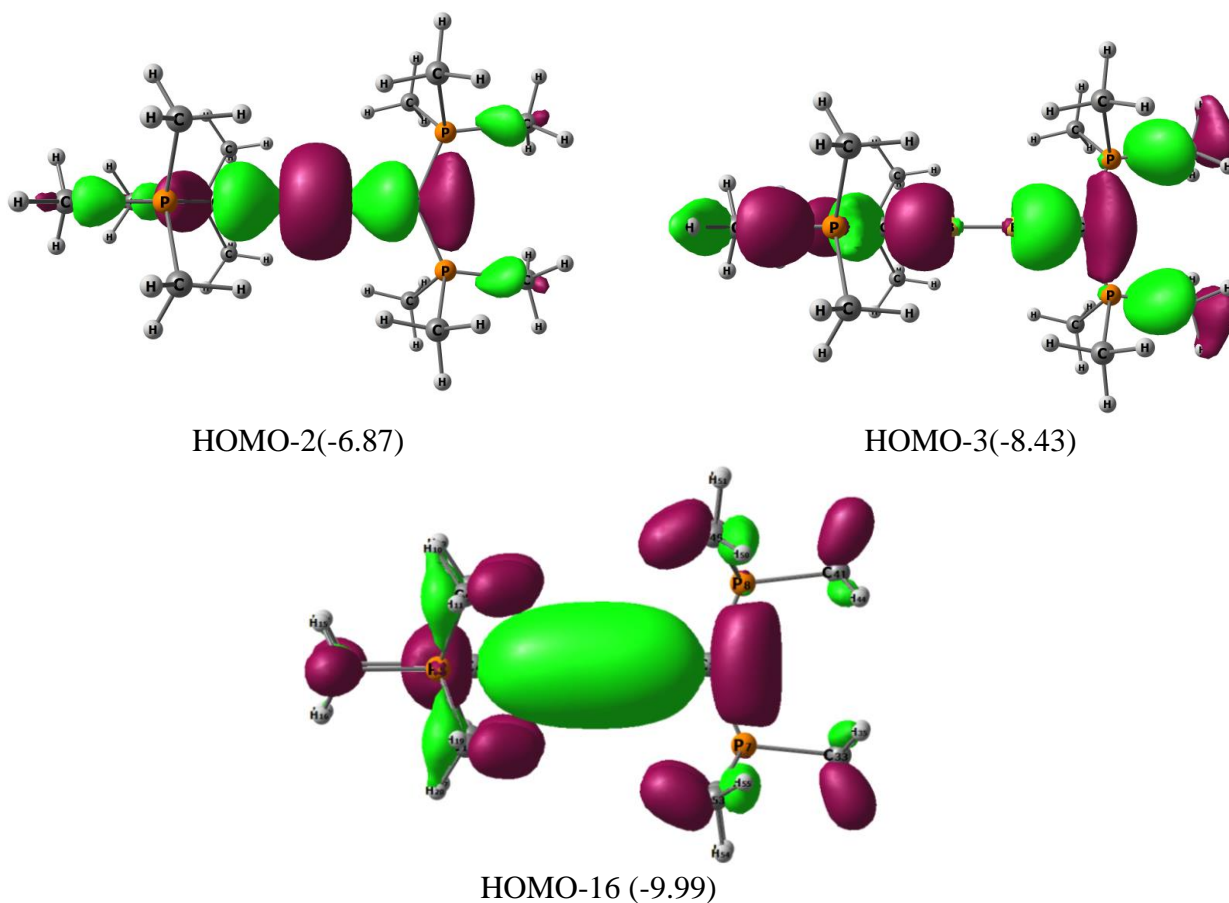

**Figure S3:** Selected  $\sigma$  MOs of **A3** at M06/def2-TZVPP//BP86/def2-TZVPP level of theory. Eigenvalues are given in eV in parenthesis. Isosurface value is 0.03. Similar orbitals are present for **A1**, **A2** and **A4**.

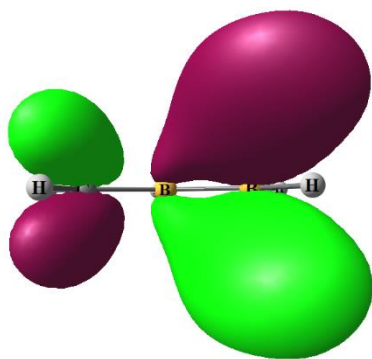

HOMO (11.89)

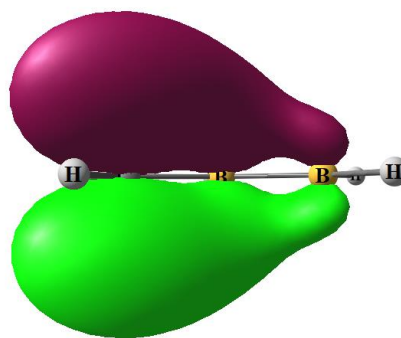

HOMO (9.36)

**Figure S4:** Allylic type  $\pi$  MOs of  $B_2CH_5$  at M06/def2-TZVPP level of theory. Eigenvalues are given in eV in parenthesis. Isosurface value is 0.03.

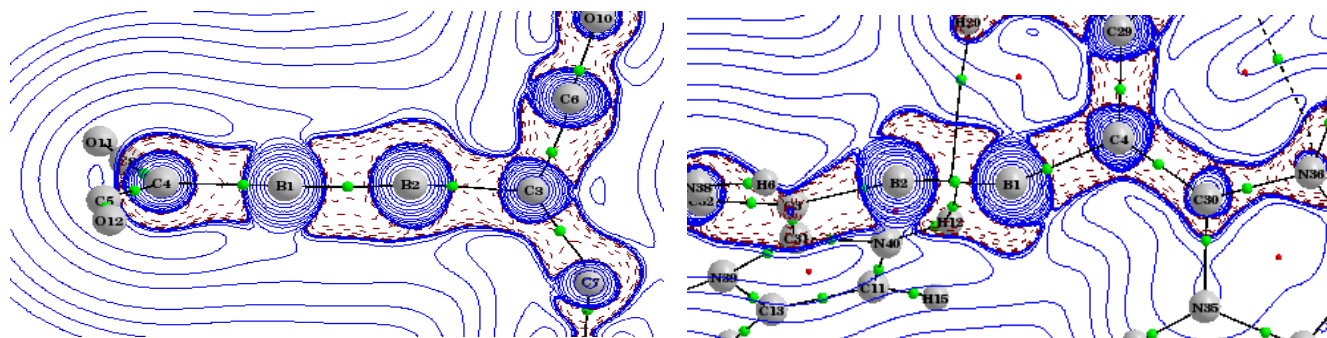

(a)

(b)

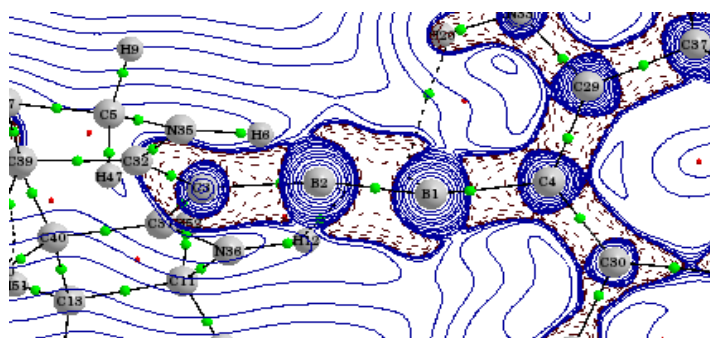

(c)

**Figure S5:** The Laplacian of the electron density plotted in the plane of B1-B2-C $_x$  ( $x=6/29$ ) of A1 (a), A2 (b) and A4 (c). BCPs are marked by green dots. The wave function was generated at M06/def2-TZVPP//BP86/def2-TZVPP level of theory.

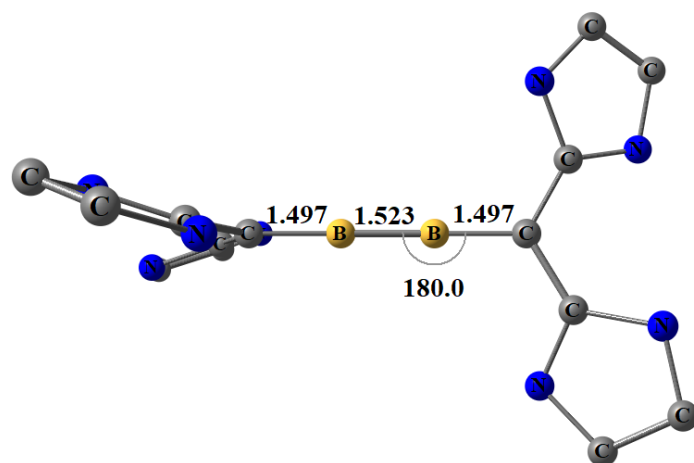

**B2(T)**

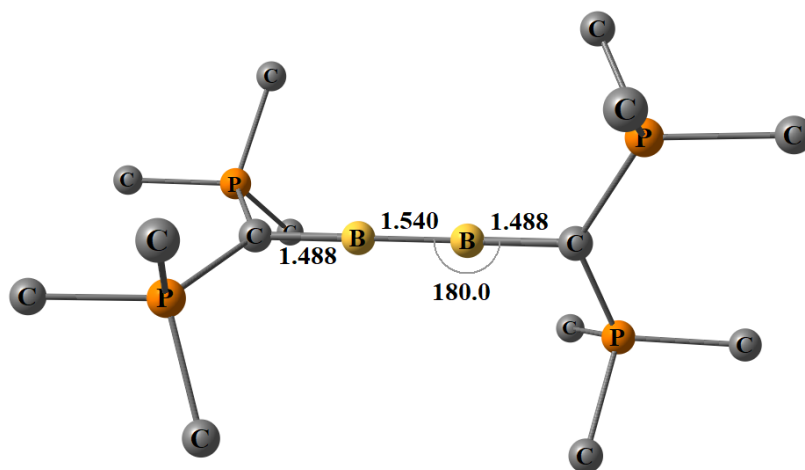

**B3(T)**

**Figure S6:** Optimized triplet geometries of **B2(T)** and **B3(T)** at BP86/def2-TZVPP level of theory. Hydrogens are omitted for better view. Geometries for **B1(T)** and **B4(T)** are already given in the manuscript.

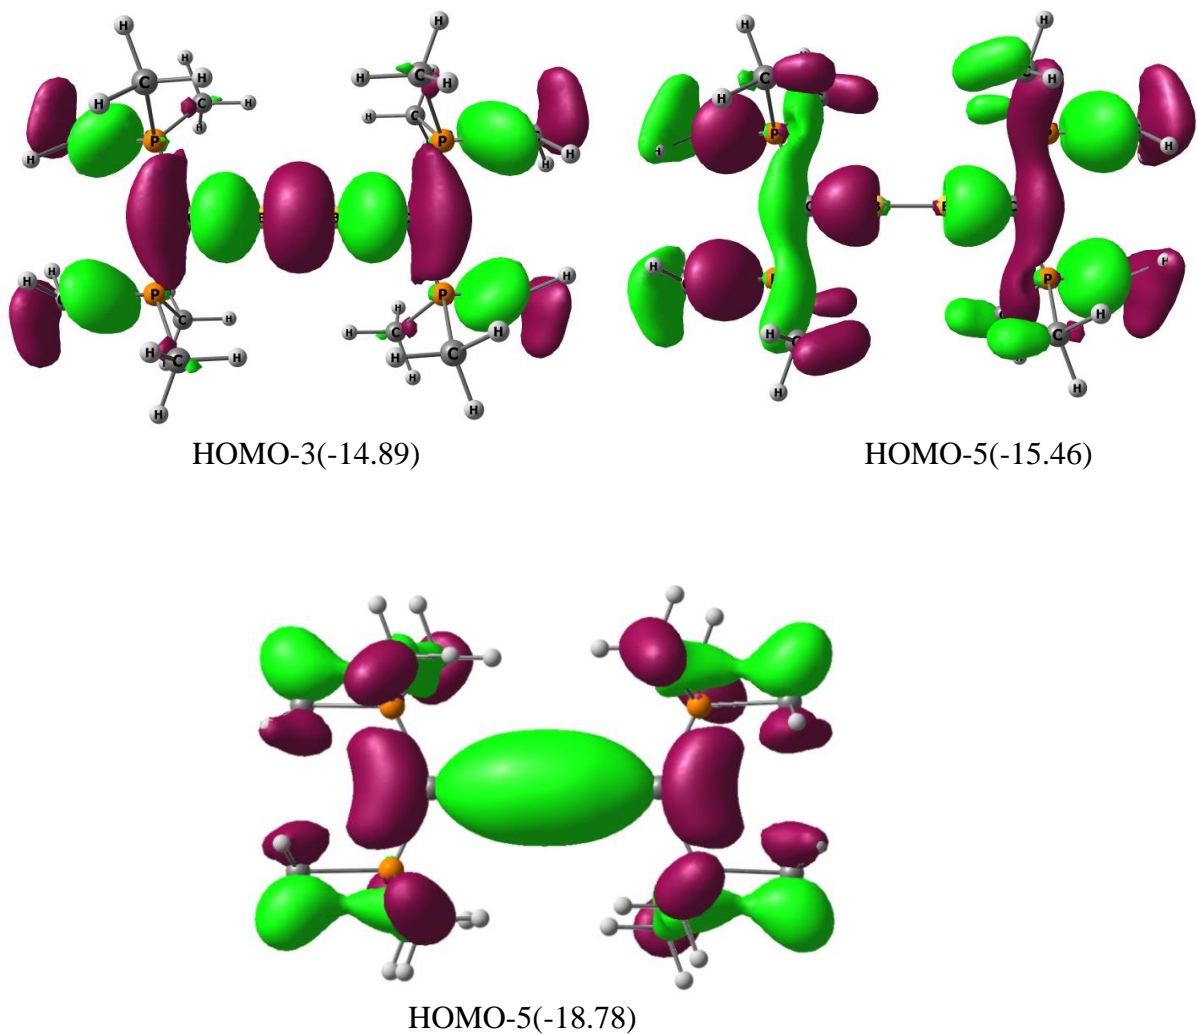

**Figure S7:** Selected  $\sigma$  MOs of **B3** at M06/def2-TZVPP//BP86/def2-TZVPP level of theory. Eigenvalues are given in eV in parenthesis. Isosurface value is 0.03. Similar orbitals are present for **B1**, **B2** and **B4**.

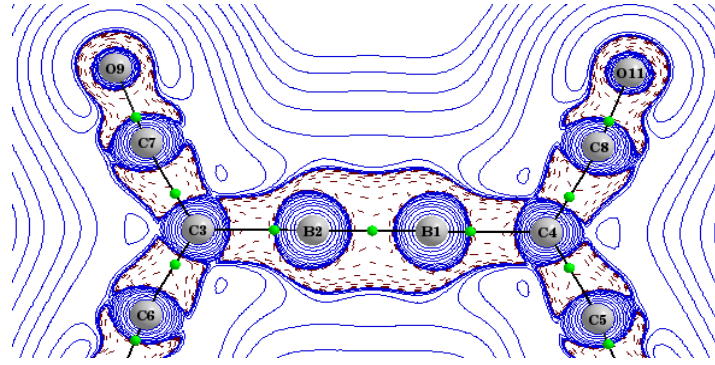

(a)

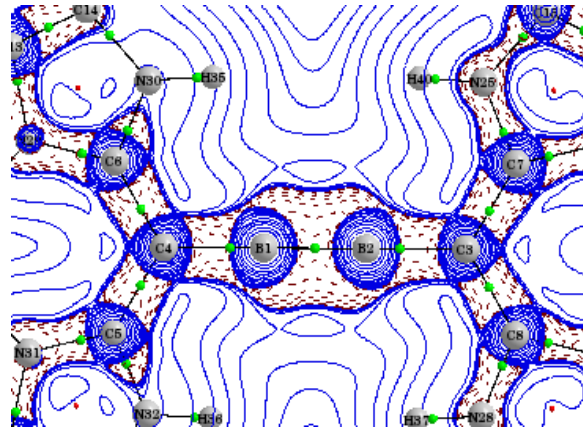

(b)

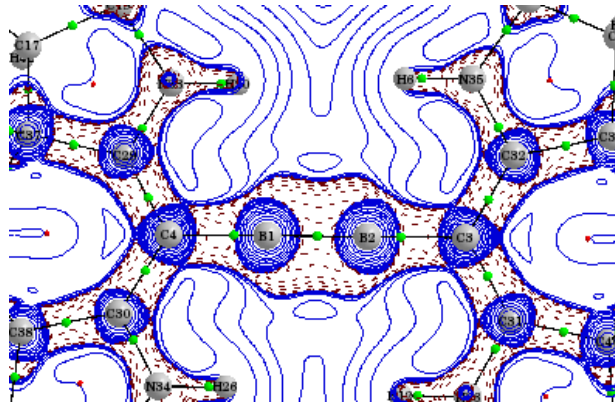

(c)

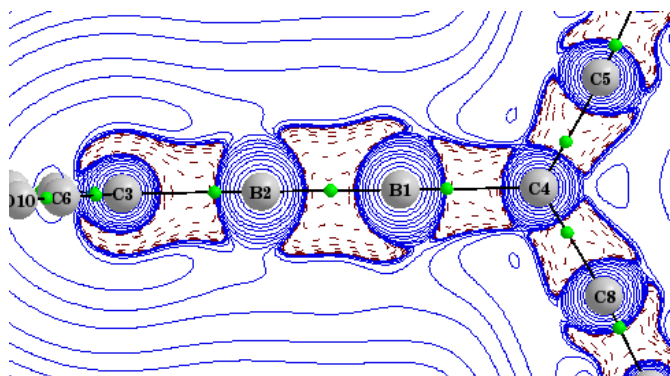

(d)

**Figure S8:** The Laplacian of the electron density plotted in the plane of B1-B2-C<sub>x</sub> ( $x=5/7/8/32$ ) of **B1** (a), **B2** (b), **B4** (c) and **B1 (T)** (d). BCPs are marked by green dots. The wave function was generated at M06/def2-TZVPP//BP86/def2-TZVPP level of theory.

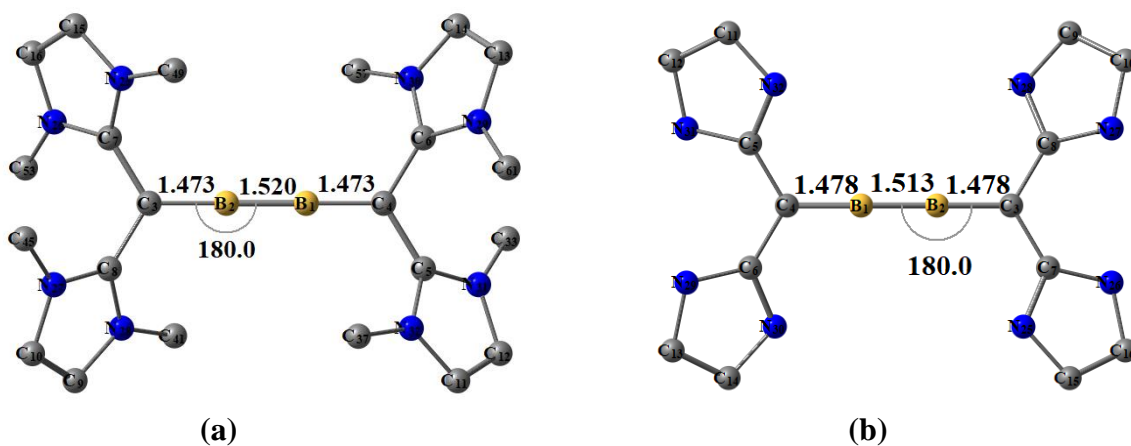

**Figure S9:** The optimized structures of the (a) **B2** and (b) **B2-NHC<sup>Me</sup>** at BP86/def2-TZVPP level of theory.



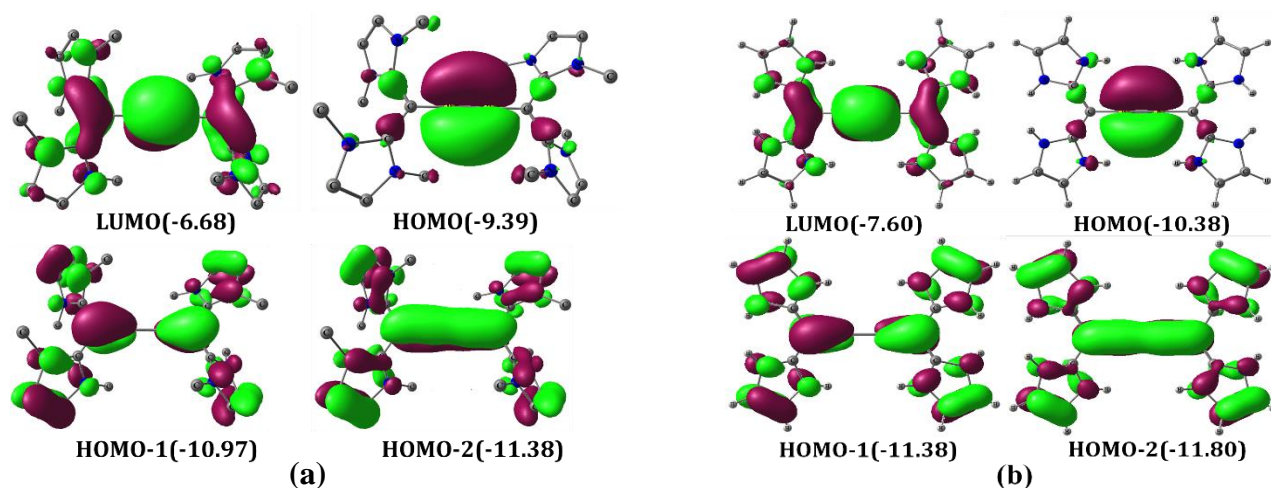

**Figure S10:** The frontier molecular orbitals of (a) **B2** and (b) **B2-NHC<sup>Me</sup>** calculated at M06/def2-TZVPP level of theory.

**Table S1:** HOMO-LUMO gap of the **AX** and **BX** at M06/def2-TZVPP level of theory.

| Molecule                                          | HOMO-LUMO Gap (eV) |
|---------------------------------------------------|--------------------|
| <b>B<sub>2</sub>-CO</b>                           | 2.58               |
| <b>B<sub>2</sub><sup>2+</sup>-CO</b>              | 2.89               |
| <b>B<sub>2</sub>-NHC</b>                          | 2.19               |
| <b>B<sub>2</sub><sup>2+</sup>-NHC</b>             | 2.78               |
| <b>B<sub>2</sub>-PMe<sub>3</sub></b>              | 2.38               |
| <b>B<sub>2</sub><sup>2+</sup>-PMe<sub>3</sub></b> | 2.98               |
| <b>B<sub>2</sub>-cAAC</b>                         | 1.70               |
| <b>B<sub>2</sub><sup>2+</sup>-cAAC</b>            | 2.56               |

**Table S2:** The variation in dissociation energy of B-B bond and complexation energies in **B<sub>2</sub><sup>2+</sup>-NHC** and **B<sub>2</sub><sup>2+</sup>-NHC<sup>Me</sup>** calculated at M06/def2-TZVPP//BP86/def2-TZVPP level of theory

|                            | De(B-B) (kcal/mol) | Complexation Energy/ (kcal/mol) |
|----------------------------|--------------------|---------------------------------|
| <b>B2</b>                  | 69.9               | -578.7                          |
| <b>B2-NHC<sup>Me</sup></b> | 62.9               | -577.5                          |

**Table S3:** Cartesian coordinates of optimized geometries at BP86/def2-TZVPP level of theory,  $E_{M06}^{el}$  (the electronic energy obtained at M06/def2-TZVPP level of theory),  $ZPE_{BP86}$  ( the zero point energy obtained from the geometry optimized at BP86/def2-TZVPP level of theory) and  $E_{total}$  ( the sum of  $ZPE_{BP86}$  and  $E_{M06}^{el}$ ) of carbene stabilized  $B_2$  and  $B_2^{2+}$ . T in parenthesis indicates triplet geometry. All others are singlet geometries. Energies are in a.u.

**A4(T)**

**$E_{M06}^{el} = -970.9469022$**

**$ZPE_{BP86} = 0.434818$**

**$E_{total} = -970.5120842$**

|          |                   |                   |                   |
|----------|-------------------|-------------------|-------------------|
| <b>B</b> | <b>0.0000000</b>  | <b>0.0000000</b>  | <b>-0.7446240</b> |
| <b>B</b> | <b>0.0000000</b>  | <b>0.0000000</b>  | <b>0.7477380</b>  |
| <b>C</b> | <b>0.0000000</b>  | <b>0.0000000</b>  | <b>2.2816000</b>  |
| <b>C</b> | <b>0.0000000</b>  | <b>0.0000000</b>  | <b>-2.2771610</b> |
| <b>C</b> | <b>-0.2497090</b> | <b>3.5927330</b>  | <b>3.0435910</b>  |
| <b>H</b> | <b>-0.0459050</b> | <b>2.3339110</b>  | <b>1.2310720</b>  |
| <b>C</b> | <b>0.1325570</b>  | <b>3.1259400</b>  | <b>4.4613460</b>  |
| <b>H</b> | <b>-1.1447380</b> | <b>1.3641290</b>  | <b>4.7827210</b>  |
| <b>H</b> | <b>-1.3255960</b> | <b>3.8512340</b>  | <b>2.9850350</b>  |
| <b>H</b> | <b>1.2012520</b>  | <b>3.3183200</b>  | <b>4.6339490</b>  |
| <b>C</b> | <b>0.2497090</b>  | <b>-3.5927330</b> | <b>3.0435910</b>  |
| <b>H</b> | <b>0.0459050</b>  | <b>-2.3339110</b> | <b>1.2310720</b>  |
| <b>C</b> | <b>-0.1325570</b> | <b>-3.1259400</b> | <b>4.4613460</b>  |
| <b>H</b> | <b>-0.5706140</b> | <b>-1.0459770</b> | <b>5.0664740</b>  |
| <b>H</b> | <b>1.3255960</b>  | <b>-3.8512340</b> | <b>2.9850350</b>  |
| <b>H</b> | <b>0.4358440</b>  | <b>-3.6428600</b> | <b>5.2454910</b>  |
| <b>C</b> | <b>-1.3827190</b> | <b>2.8005810</b>  | <b>-4.4675450</b> |
| <b>H</b> | <b>-0.0240890</b> | <b>1.1680560</b>  | <b>-5.0759970</b> |
| <b>C</b> | <b>-1.9201090</b> | <b>3.0473240</b>  | <b>-3.0452850</b> |
| <b>H</b> | <b>-1.1357040</b> | <b>2.0488630</b>  | <b>-1.2337110</b> |
| <b>H</b> | <b>-2.1386560</b> | <b>2.9777370</b>  | <b>-5.2436360</b> |
| <b>H</b> | <b>-2.9887580</b> | <b>2.7643950</b>  | <b>-2.9671260</b> |
| <b>C</b> | <b>1.3827190</b>  | <b>-2.8005810</b> | <b>-4.4675450</b> |

|   |            |            |            |
|---|------------|------------|------------|
| H | 0.0240890  | -1.1680560 | -5.0759970 |
| C | 1.9201090  | -3.0473240 | -3.0452850 |
| H | 1.1357040  | -2.0488630 | -1.2337110 |
| H | 2.1386560  | -2.9777370 | -5.2436360 |
| H | 1.8252490  | -4.0953230 | -2.7250600 |
| C | -0.5819390 | 1.0998820  | -2.9540880 |
| C | 0.5819390  | -1.0998820 | -2.9540880 |
| C | 0.0000000  | -1.2439200 | 2.9570620  |
| C | 0.0000000  | 1.2439200  | 2.9570620  |
| N | -1.0705790 | 2.1712650  | -2.2533140 |
| N | 1.0705790  | -2.1712650 | -2.2533140 |
| N | 0.0668080  | 2.4141530  | 2.2514660  |
| N | -0.0668080 | -2.4141530 | 2.2514660  |
| C | -0.8883100 | 1.3353690  | -4.4195130 |
| C | 0.8883100  | -1.3353690 | -4.4195130 |
| C | -0.1261430 | 1.6009510  | 4.4242360  |
| C | 0.1261430  | -1.6009510 | 4.4242360  |
| H | -1.8252490 | 4.0953230  | -2.7250600 |
| H | -0.5344880 | 3.4732520  | -4.6600950 |
| H | -1.6798830 | 0.6398030  | -4.7540380 |
| H | 1.6798830  | -0.6398030 | -4.7540380 |
| H | 0.5344880  | -3.4732520 | -4.6600950 |
| H | 2.9887580  | -2.7643950 | -2.9671260 |
| H | 0.3259840  | 4.4675440  | 2.7079220  |
| H | -0.4358440 | 3.6428600  | 5.2454910  |
| H | 0.5706140  | 1.0459770  | 5.0664740  |
| H | 1.1447380  | -1.3641290 | 4.7827210  |
| H | -1.2012520 | -3.3183200 | 4.6339490  |
| H | -0.3259840 | -4.4675440 | 2.7079220  |

A4

$E_{M06}^{el} = -970.9525183$

$ZPE_{BP86} = 0.434505$

$E_{total} = -970.5180133$

|   |            |            |            |
|---|------------|------------|------------|
| B | -0.1600920 | 0.7201250  | 0.0905390  |
| B | 0.1600920  | -0.7201250 | 0.0905390  |
| C | 0.0135550  | -2.2509790 | 0.0051170  |
| C | -0.0135550 | 2.2509790  | 0.0051170  |
| C | -3.2657340 | -2.4200790 | -1.6185010 |
| H | -1.7621120 | -0.8430730 | -0.9285750 |
| C | -2.8938980 | -3.9041990 | -1.8254700 |
| H | -0.9711740 | -4.8390330 | -1.2530750 |
| H | -3.5927630 | -1.9245420 | -2.5443180 |
| H | -3.7390620 | -4.5818700 | -1.6456880 |
| C | 2.7983190  | -3.5147070 | 2.0179870  |
| H | 1.9900610  | -1.5401980 | 1.3540110  |
| C | 2.4483880  | -4.8531290 | 1.3360630  |
| H | 0.8804670  | -5.1555640 | -0.1938350 |
| H | 2.4918940  | -3.5061810 | 3.0808240  |
| H | 2.4911410  | -5.7036650 | 2.0288480  |
| C | 2.8938980  | 3.9041990  | -1.8254700 |
| H | 0.9711740  | 4.8390330  | -1.2530750 |
| C | 3.2657340  | 2.4200790  | -1.6185010 |
| H | 1.7621120  | 0.8430730  | -0.9285750 |
| H | 3.7390620  | 4.5818700  | -1.6456880 |
| H | 4.0709290  | 2.2974160  | -0.8709580 |
| C | -2.4483880 | 4.8531290  | 1.3360630  |
| H | -0.2492640 | 4.9626350  | 1.4450220  |
| C | -2.7983190 | 3.5147070  | 2.0179870  |
| H | -1.9900610 | 1.5401980  | 1.3540110  |

|   |            |            |            |
|---|------------|------------|------------|
| H | -3.1604340 | 5.0460930  | 0.5209970  |
| H | -2.4918940 | 3.5061810  | 3.0808240  |
| C | 1.1487680  | 2.7446020  | -0.6392330 |
| C | -0.9560000 | 3.1110780  | 0.5922230  |
| C | 0.9560000  | -3.1110780 | 0.5922230  |
| C | -1.1487680 | -2.7446020 | -0.6392330 |
| N | 2.0172090  | 1.8522940  | -1.1312810 |
| N | -2.0172090 | 2.5678140  | 1.2353040  |
| N | -2.0172090 | -1.8522940 | -1.1312810 |
| N | 2.0172090  | -2.5678140 | 1.2353040  |
| C | 1.7115700  | 4.1343420  | -0.8519770 |
| C | -1.0350060 | 4.6155620  | 0.7500220  |
| C | -1.7115700 | -4.1343420 | -0.8519770 |
| C | 1.0350060  | -4.6155620 | 0.7500220  |
| H | 3.5927630  | 1.9245420  | -2.5443180 |
| H | 2.5561240  | 4.0574760  | -2.8604090 |
| H | 2.0539650  | 4.5503000  | 0.1125020  |
| H | -0.8804670 | 5.1555640  | -0.1938350 |
| H | -2.4911410 | 5.7036650  | 2.0288480  |
| H | -3.8719630 | 3.2796230  | 1.9764140  |
| H | -4.0709290 | -2.2974160 | -0.8709580 |
| H | -2.5561240 | -4.0574760 | -2.8604090 |
| H | -2.0539650 | -4.5503000 | 0.1125020  |
| H | 0.2492640  | -4.9626350 | 1.4450220  |
| H | 3.1604340  | -5.0460930 | 0.5209970  |
| H | 3.8719630  | -3.2796230 | 1.9764140  |

A1(T)

$E_{M06}^{el} = -578.8846907$

$ZPE_{BP86} = 0.046003$

**E<sub>total</sub> = -578.8386877**

|          |                   |                   |                   |
|----------|-------------------|-------------------|-------------------|
| <b>B</b> | <b>-0.0250600</b> | <b>0.7539670</b>  | <b>0.0514050</b>  |
| <b>B</b> | <b>0.0250600</b>  | <b>-0.7539670</b> | <b>-0.0514050</b> |
| <b>C</b> | <b>0.0927120</b>  | <b>-2.2413390</b> | <b>-0.0255160</b> |
| <b>C</b> | <b>-0.0927120</b> | <b>2.2413390</b>  | <b>0.0255160</b>  |
| <b>C</b> | <b>-1.3256050</b> | <b>3.0420900</b>  | <b>-0.1394360</b> |
| <b>C</b> | <b>1.3256050</b>  | <b>-3.0420900</b> | <b>0.1394360</b>  |
| <b>C</b> | <b>-1.1621470</b> | <b>-2.7245260</b> | <b>0.0036590</b>  |
| <b>C</b> | <b>1.1621470</b>  | <b>2.7245260</b>  | <b>-0.0036590</b> |
| <b>O</b> | <b>-2.2657250</b> | <b>-3.0951450</b> | <b>-0.0147730</b> |
| <b>O</b> | <b>2.4772820</b>  | <b>-2.8753680</b> | <b>-0.0515260</b> |
| <b>O</b> | <b>2.2657250</b>  | <b>3.0951450</b>  | <b>0.0147730</b>  |
| <b>O</b> | <b>-2.4772820</b> | <b>2.8753680</b>  | <b>0.0515260</b>  |

**A1**

**E<sup>el</sup><sub>M06</sub> = -578.8847128**

**ZPE<sub>BP86</sub> = 0.045575**

**E<sub>total</sub> = -578.8391378**

|          |                   |                   |                   |
|----------|-------------------|-------------------|-------------------|
| <b>B</b> | <b>0.0710650</b>  | <b>-0.7524770</b> | <b>-0.0097960</b> |
| <b>B</b> | <b>-0.0710650</b> | <b>0.7524770</b>  | <b>-0.0097960</b> |
| <b>C</b> | <b>-0.0710650</b> | <b>2.2347070</b>  | <b>0.0073370</b>  |
| <b>C</b> | <b>0.0710650</b>  | <b>-2.2347070</b> | <b>0.0073370</b>  |
| <b>C</b> | <b>-0.7898410</b> | <b>-2.9815650</b> | <b>0.9029850</b>  |
| <b>C</b> | <b>-0.9607480</b> | <b>2.6182980</b>  | <b>-0.9208170</b> |
| <b>C</b> | <b>0.7898410</b>  | <b>2.9815650</b>  | <b>0.9029850</b>  |
| <b>C</b> | <b>0.9607480</b>  | <b>-2.6182980</b> | <b>-0.9208170</b> |
| <b>O</b> | <b>1.5918310</b>  | <b>2.9506440</b>  | <b>1.7539810</b>  |
| <b>O</b> | <b>-1.7496130</b> | <b>2.8971820</b>  | <b>-1.7399880</b> |
| <b>O</b> | <b>1.7496130</b>  | <b>-2.8971820</b> | <b>-1.7399880</b> |
| <b>O</b> | <b>-1.5918310</b> | <b>-2.9506440</b> | <b>1.7539810</b>  |

**A2(T)**

**$E_{M06}^{el} = -1030.260092$**

**$ZPE_{BP86} = 0.292376$**

**$E_{total} = -1029.967716$**

|          |                   |                   |                   |
|----------|-------------------|-------------------|-------------------|
| <b>B</b> | <b>0.2068890</b>  | <b>0.7273930</b>  | <b>0.0513490</b>  |
| <b>B</b> | <b>-0.2068890</b> | <b>-0.7273930</b> | <b>0.0513490</b>  |
| <b>C</b> | <b>-0.0006150</b> | <b>-2.2402890</b> | <b>0.0123050</b>  |
| <b>C</b> | <b>0.0006150</b>  | <b>2.2402890</b>  | <b>0.0123050</b>  |
| <b>C</b> | <b>-1.3306990</b> | <b>2.6857000</b>  | <b>-0.2228910</b> |
| <b>C</b> | <b>1.0910920</b>  | <b>3.1163540</b>  | <b>0.2212950</b>  |
| <b>C</b> | <b>1.3306990</b>  | <b>-2.6857000</b> | <b>-0.2228910</b> |
| <b>C</b> | <b>-1.0910920</b> | <b>-3.1163540</b> | <b>0.2212950</b>  |
| <b>C</b> | <b>-3.2500330</b> | <b>-3.7056220</b> | <b>0.6286970</b>  |
| <b>C</b> | <b>-2.5335260</b> | <b>-4.8537540</b> | <b>0.4906170</b>  |
| <b>C</b> | <b>-3.5546200</b> | <b>2.4639340</b>  | <b>-0.5888150</b> |
| <b>C</b> | <b>-3.2819210</b> | <b>3.7988230</b>  | <b>-0.5607960</b> |
| <b>C</b> | <b>2.5335260</b>  | <b>4.8537540</b>  | <b>0.4906170</b>  |
| <b>C</b> | <b>3.2500330</b>  | <b>3.7056220</b>  | <b>0.6286970</b>  |
| <b>C</b> | <b>3.5546200</b>  | <b>-2.4639340</b> | <b>-0.5888150</b> |
| <b>C</b> | <b>3.2819210</b>  | <b>-3.7988230</b> | <b>-0.5607960</b> |
| <b>H</b> | <b>-4.4882590</b> | <b>1.9352730</b>  | <b>-0.7416060</b> |
| <b>H</b> | <b>-3.9217750</b> | <b>4.6646620</b>  | <b>-0.6831250</b> |
| <b>H</b> | <b>2.8295940</b>  | <b>5.8949510</b>  | <b>0.5481680</b>  |
| <b>H</b> | <b>4.3009720</b>  | <b>3.5434750</b>  | <b>0.8361930</b>  |
| <b>H</b> | <b>4.4882590</b>  | <b>-1.9352730</b> | <b>-0.7416060</b> |
| <b>H</b> | <b>3.9217750</b>  | <b>-4.6646620</b> | <b>-0.6831250</b> |
| <b>H</b> | <b>-2.8295940</b> | <b>-5.8949510</b> | <b>0.5481680</b>  |
| <b>H</b> | <b>-4.3009720</b> | <b>-3.5434750</b> | <b>0.8361930</b>  |
| <b>N</b> | <b>2.3584050</b>  | <b>-1.8019840</b> | <b>-0.3863110</b> |

|   |            |            |            |
|---|------------|------------|------------|
| N | 1.9119790  | -3.9271590 | -0.3395620 |
| N | -1.2112220 | -4.4860140 | 0.2500140  |
| N | -2.3584050 | -2.6566970 | 0.4655580  |
| N | 1.2112220  | 4.4860140  | 0.2500140  |
| N | 2.3584050  | 2.6566970  | 0.4655580  |
| N | -1.9119790 | 3.9271590  | -0.3395620 |
| N | -2.3584050 | 1.8019840  | -0.3863110 |
| H | -1.4194310 | 4.8411130  | -0.2514090 |
| H | 0.4478940  | 5.1667370  | 0.0422340  |
| H | 2.5156660  | 1.6381300  | 0.4865970  |
| H | -2.1171890 | 0.7838490  | -0.3041650 |
| H | -2.5156660 | -1.6381300 | 0.4865970  |
| H | -0.4478940 | -5.1667370 | 0.0422340  |
| H | 1.4194310  | -4.8411130 | -0.2514090 |
| H | 2.1171890  | -0.7838490 | -0.3041650 |

A2

$E_{M06}^{el} = -1030.303585$

$ZPE_{BP86} = 0.296388$

$E_{total} = -1030.007197$

|   |            |            |            |
|---|------------|------------|------------|
| B | -0.7188010 | 0.1828600  | 0.2899030  |
| B | 0.7188590  | -0.1833950 | 0.2900310  |
| C | 2.2293360  | 0.0741210  | 0.0837930  |
| C | -2.2293460 | -0.0744050 | 0.0837810  |
| C | 4.1191880  | -2.4484730 | 1.8234710  |
| H | 1.9902950  | -1.8975660 | 1.8081060  |
| C | 5.1433430  | -1.8737260 | 1.1419210  |
| H | 4.9996440  | -0.5226160 | -0.4804160 |
| H | 4.1280020  | -3.2723650 | 2.5265870  |
| H | 6.2005710  | -2.1090010 | 1.1319030  |



|   |            |            |            |
|---|------------|------------|------------|
| C | 2.0656660  | 3.2075030  | -1.6438050 |
| H | 0.5644630  | 1.6495360  | -0.8542380 |
| C | 3.4221420  | 3.1614230  | -1.4984080 |
| H | 4.5856450  | 1.7292680  | -0.4098640 |
| H | 1.4427290  | 3.9696790  | -2.0962970 |
| H | 4.1969380  | 3.8608490  | -1.7922130 |
| C | -3.4231610 | -3.1616980 | -1.4976580 |
| H | -4.5859970 | -1.7294180 | -0.4087010 |
| C | -2.0667440 | -3.2081010 | -1.6433480 |
| H | -0.5650770 | -1.6505550 | -0.8545820 |
| H | -4.1981620 | -3.8609830 | -1.7912510 |
| H | -1.4440710 | -3.9704540 | -2.0959030 |
| C | -5.1424240 | 1.8747130  | 1.1421930  |
| H | -4.9998150 | 0.5227060  | -0.4796200 |
| C | -4.1178970 | 2.4491410  | 1.8234810  |
| H | -1.9891750 | 1.8972800  | 1.8076550  |
| H | -6.1995520 | 2.1104420  | 1.1322780  |
| H | -4.1262280 | 3.2731560  | 2.5264560  |
| C | -2.5406880 | -1.2604830 | -0.6228010 |
| C | -3.2212700 | 0.7438070  | 0.6136470  |
| C | 2.5402650  | 1.2601840  | -0.6230970 |
| C | 3.2215980  | -0.7437030 | 0.6135330  |
| N | -3.7204090 | -1.9296020 | -0.8985880 |
| N | -1.5439270 | -2.0398020 | -1.1222560 |
| N | -2.9578890 | 1.7649400  | 1.4990690  |
| N | -4.6152500 | 0.7765180  | 0.4258650  |
| N | 4.6156300  | -0.7757800 | 0.4255080  |
| N | 2.9588060  | -1.7648630 | 1.4991390  |
| N | 3.7197430  | 1.9295290  | -0.8991610 |
| N | 1.5432160  | 2.0391870  | -1.1224040 |

**A3**

**$E_{M06}^{el} = -1969.858558$**

**$ZPE_{BP86} = 0.457448$**

**$E_{total} = -1969.40111$**

|          |                   |                   |                   |
|----------|-------------------|-------------------|-------------------|
| <b>B</b> | <b>0.0000000</b>  | <b>0.0000000</b>  | <b>0.7433200</b>  |
| <b>B</b> | <b>0.0000000</b>  | <b>0.0000000</b>  | <b>-0.7433200</b> |
| <b>C</b> | <b>0.0000000</b>  | <b>0.0000000</b>  | <b>2.2698970</b>  |
| <b>C</b> | <b>0.0000000</b>  | <b>0.0000000</b>  | <b>-2.2698970</b> |
| <b>P</b> | <b>1.5704600</b>  | <b>0.0000000</b>  | <b>-2.9470410</b> |
| <b>P</b> | <b>-1.5704600</b> | <b>0.0000000</b>  | <b>-2.9470410</b> |
| <b>P</b> | <b>0.0000000</b>  | <b>1.5704600</b>  | <b>2.9470410</b>  |
| <b>P</b> | <b>0.0000000</b>  | <b>-1.5704600</b> | <b>2.9470410</b>  |
| <b>C</b> | <b>2.5400700</b>  | <b>-1.4545210</b> | <b>-2.4098440</b> |
| <b>H</b> | <b>2.2116980</b>  | <b>-2.3398250</b> | <b>-2.9733800</b> |
| <b>H</b> | <b>3.6201080</b>  | <b>-1.3084020</b> | <b>-2.5464770</b> |
| <b>H</b> | <b>2.3047870</b>  | <b>-1.5833980</b> | <b>-1.3423910</b> |
| <b>C</b> | <b>1.7715480</b>  | <b>0.0000000</b>  | <b>-4.7899730</b> |
| <b>H</b> | <b>2.8350520</b>  | <b>0.0000000</b>  | <b>-5.0673530</b> |
| <b>H</b> | <b>1.2980660</b>  | <b>-0.8941050</b> | <b>-5.2160600</b> |
| <b>H</b> | <b>1.2980660</b>  | <b>0.8941050</b>  | <b>-5.2160600</b> |
| <b>C</b> | <b>2.5400700</b>  | <b>1.4545210</b>  | <b>-2.4098440</b> |
| <b>H</b> | <b>2.3047870</b>  | <b>1.5833980</b>  | <b>-1.3423910</b> |
| <b>H</b> | <b>3.6201080</b>  | <b>1.3084020</b>  | <b>-2.5464770</b> |
| <b>H</b> | <b>2.2116980</b>  | <b>2.3398250</b>  | <b>-2.9733800</b> |
| <b>C</b> | <b>-1.7715480</b> | <b>0.0000000</b>  | <b>-4.7899730</b> |
| <b>H</b> | <b>-1.2980660</b> | <b>0.8941050</b>  | <b>-5.2160600</b> |
| <b>H</b> | <b>-1.2980660</b> | <b>-0.8941050</b> | <b>-5.2160600</b> |
| <b>H</b> | <b>-2.8350520</b> | <b>0.0000000</b>  | <b>-5.0673530</b> |
| <b>C</b> | <b>-2.5400700</b> | <b>1.4545210</b>  | <b>-2.4098440</b> |

|   |            |            |            |
|---|------------|------------|------------|
| H | -2.3047870 | 1.5833980  | -1.3423910 |
| H | -2.2116980 | 2.3398250  | -2.9733800 |
| H | -3.6201080 | 1.3084020  | -2.5464770 |
| C | -2.5400700 | -1.4545210 | -2.4098440 |
| H | -2.2116980 | -2.3398250 | -2.9733800 |
| H | -2.3047870 | -1.5833980 | -1.3423910 |
| H | -3.6201080 | -1.3084020 | -2.5464770 |
| C | 0.0000000  | 1.7715480  | 4.7899730  |
| H | -0.8941050 | 1.2980660  | 5.2160600  |
| H | 0.8941050  | 1.2980660  | 5.2160600  |
| H | 0.0000000  | 2.8350520  | 5.0673530  |
| C | -1.4545210 | 2.5400700  | 2.4098440  |
| H | -1.5833980 | 2.3047870  | 1.3423910  |
| H | -2.3398250 | 2.2116980  | 2.9733800  |
| H | -1.3084020 | 3.6201080  | 2.5464770  |
| C | 0.0000000  | -1.7715480 | 4.7899730  |
| H | -0.8941050 | -1.2980660 | 5.2160600  |
| H | 0.0000000  | -2.8350520 | 5.0673530  |
| H | 0.8941050  | -1.2980660 | 5.2160600  |
| C | -1.4545210 | -2.5400700 | 2.4098440  |
| H | -1.5833980 | -2.3047870 | 1.3423910  |
| H | -1.3084020 | -3.6201080 | 2.5464770  |
| H | -2.3398250 | -2.2116980 | 2.9733800  |
| C | 1.4545210  | -2.5400700 | 2.4098440  |
| H | 2.3398250  | -2.2116980 | 2.9733800  |
| H | 1.3084020  | -3.6201080 | 2.5464770  |
| H | 1.5833980  | -2.3047870 | 1.3423910  |
| C | 1.4545210  | 2.5400700  | 2.4098440  |
| H | 1.3084020  | 3.6201080  | 2.5464770  |
| H | 2.3398250  | 2.2116980  | 2.9733800  |

H 1.5833980 2.3047870 1.3423910

B4(T)

$E_{M06}^{el} = -970.5642123$

$ZPE_{BP86} = 0.443093$

$E_{total} = -970.1211193$

B 0.0000000 0.0000000 0.7640720

B 0.0000000 0.0000000 -0.7640720

C 0.0000000 0.0000000 -2.2733190

C 0.0000000 0.0000000 2.2733190

C -3.6180080 0.0000000 -3.1674690

H -2.4557590 0.0738140 -1.3031390

C -3.0512870 -0.4340980 -4.5292040

H -1.3554080 0.9339980 -4.8725720

H -4.0448680 1.0151250 -3.1823070

H -3.1647070 -1.5186330 -4.6555020

C 3.6180080 0.0000000 -3.1674690

H 2.4557590 -0.0738140 -1.3031390

C 3.0512870 0.4340980 -4.5292040

H 0.9155130 0.7746150 -4.9928370

H 4.0448680 -1.0151250 -3.1823070

H 3.5599320 -0.0556810 -5.3661850

C -0.4340980 3.0512870 4.5292040

H -0.7746150 0.9155130 4.9928370

C 0.0000000 3.6180080 3.1674690

H 0.0738140 2.4557590 1.3031390

H 0.0556810 3.5599320 5.3661850

H 1.0151250 4.0448680 3.1823070

C 0.4340980 -3.0512870 4.5292040

H 0.7746150 -0.9155130 4.9928370

|   |            |            |            |
|---|------------|------------|------------|
| C | 0.0000000  | -3.6180080 | 3.1674690  |
| H | -0.0738140 | -2.4557590 | 1.3031390  |
| H | -0.0556810 | -3.5599320 | 5.3661850  |
| H | 0.6857120  | -4.3732130 | 2.7635150  |
| C | -0.0290870 | 1.2512200  | 2.9669010  |
| C | 0.0290870  | -1.2512200 | 2.9669010  |
| C | 1.2512200  | 0.0290870  | -2.9669010 |
| C | -1.2512200 | -0.0290870 | -2.9669010 |
| N | -0.0107210 | 2.4129190  | 2.3196140  |
| N | 0.0107210  | -2.4129190 | 2.3196140  |
| N | -2.4129190 | -0.0107210 | -2.3196140 |
| N | 2.4129190  | 0.0107210  | -2.3196140 |
| C | -0.0665780 | 1.5514810  | 4.4510920  |
| C | 0.0665780  | -1.5514810 | 4.4510920  |
| C | -1.5514810 | -0.0665780 | -4.4510920 |
| C | 1.5514810  | 0.0665780  | -4.4510920 |
| H | -0.6857120 | 4.3732130  | 2.7635150  |
| H | -1.5186330 | 3.1647070  | 4.6555020  |
| H | 0.9339980  | 1.3554080  | 4.8725720  |
| H | -0.9339980 | -1.3554080 | 4.8725720  |
| H | 1.5186330  | -3.1647070 | 4.6555020  |
| H | -1.0151250 | -4.0448680 | 3.1823070  |
| H | -4.3732130 | -0.6857120 | -2.7635150 |
| H | -3.5599320 | 0.0556810  | -5.3661850 |
| H | -0.9155130 | -0.7746150 | -4.9928370 |
| H | 1.3554080  | -0.9339980 | -4.8725720 |
| H | 3.1647070  | 1.5186330  | -4.6555020 |
| H | 4.3732130  | 0.6857120  | -2.7635150 |

**B4**

$E_{M06}^{el} = -970.5584108$

$ZPE_{BP86} = 0.442913$

$E_{total} = -970.1154978$

|          |                   |                   |                   |
|----------|-------------------|-------------------|-------------------|
| <b>B</b> | <b>0.0000000</b>  | <b>0.0000000</b>  | <b>0.7627750</b>  |
| <b>B</b> | <b>0.0000000</b>  | <b>0.0000000</b>  | <b>-0.7627750</b> |
| <b>C</b> | <b>0.0000000</b>  | <b>0.0000000</b>  | <b>-2.2590880</b> |
| <b>C</b> | <b>0.0000000</b>  | <b>0.0000000</b>  | <b>2.2590880</b>  |
| <b>C</b> | <b>0.4338820</b>  | <b>3.5925170</b>  | <b>-3.1591930</b> |
| <b>H</b> | <b>0.3089050</b>  | <b>2.3772460</b>  | <b>-1.3003440</b> |
| <b>C</b> | <b>0.7119760</b>  | <b>2.9970090</b>  | <b>-4.5506330</b> |
| <b>H</b> | <b>0.7956660</b>  | <b>0.8371200</b>  | <b>-5.0244560</b> |
| <b>H</b> | <b>1.2354540</b>  | <b>4.2435230</b>  | <b>-2.7882330</b> |
| <b>H</b> | <b>0.2301410</b>  | <b>3.5682000</b>  | <b>-5.3509960</b> |
| <b>C</b> | <b>-0.4338820</b> | <b>-3.5925170</b> | <b>-3.1591930</b> |
| <b>H</b> | <b>-0.3089050</b> | <b>-2.3772460</b> | <b>-1.3003440</b> |
| <b>C</b> | <b>-0.7119760</b> | <b>-2.9970090</b> | <b>-4.5506330</b> |
| <b>H</b> | <b>0.8486960</b>  | <b>-1.4575460</b> | <b>-4.8360150</b> |
| <b>H</b> | <b>-1.2354540</b> | <b>-4.2435230</b> | <b>-2.7882330</b> |
| <b>H</b> | <b>-1.7916820</b> | <b>-2.9897740</b> | <b>-4.7474910</b> |
| <b>C</b> | <b>-0.7119760</b> | <b>2.9970090</b>  | <b>4.5506330</b>  |
| <b>H</b> | <b>-0.7956660</b> | <b>0.8371200</b>  | <b>5.0244560</b>  |
| <b>C</b> | <b>-0.4338820</b> | <b>3.5925170</b>  | <b>3.1591930</b>  |
| <b>H</b> | <b>-0.3089050</b> | <b>2.3772460</b>  | <b>1.3003440</b>  |
| <b>H</b> | <b>-0.2301410</b> | <b>3.5682000</b>  | <b>5.3509960</b>  |
| <b>H</b> | <b>0.5152850</b>  | <b>4.1488950</b>  | <b>3.1093020</b>  |
| <b>C</b> | <b>0.7119760</b>  | <b>-2.9970090</b> | <b>4.5506330</b>  |
| <b>H</b> | <b>0.7956660</b>  | <b>-0.8371200</b> | <b>5.0244560</b>  |
| <b>C</b> | <b>0.4338820</b>  | <b>-3.5925170</b> | <b>3.1591930</b>  |
| <b>H</b> | <b>0.3089050</b>  | <b>-2.3772460</b> | <b>1.3003440</b>  |

|   |            |            |            |
|---|------------|------------|------------|
| H | 0.2301410  | -3.5682000 | 5.3509960  |
| H | 1.2354540  | -4.2435230 | 2.7882330  |
| C | -0.1698560 | 1.2442710  | 2.9728850  |
| C | 0.1698560  | -1.2442710 | 2.9728850  |
| C | -0.1698560 | -1.2442710 | -2.9728850 |
| C | 0.1698560  | 1.2442710  | -2.9728850 |
| N | -0.3332230 | 2.3834250  | 2.3261890  |
| N | 0.3332230  | -2.3834250 | 2.3261890  |
| N | 0.3332230  | 2.3834250  | -2.3261890 |
| N | -0.3332230 | -2.3834250 | -2.3261890 |
| C | -0.1836680 | 1.5458270  | 4.4564490  |
| C | 0.1836680  | -1.5458270 | 4.4564490  |
| C | 0.1836680  | 1.5458270  | -4.4564490 |
| C | -0.1836680 | -1.5458270 | -4.4564490 |
| H | -1.2354540 | 4.2435230  | 2.7882330  |
| H | -1.7916820 | 2.9897740  | 4.7474910  |
| H | 0.8486960  | 1.4575460  | 4.8360150  |
| H | -0.8486960 | -1.4575460 | 4.8360150  |
| H | 1.7916820  | -2.9897740 | 4.7474910  |
| H | -0.5152850 | -4.1488950 | 3.1093020  |
| H | -0.5152850 | 4.1488950  | -3.1093020 |
| H | 1.7916820  | 2.9897740  | -4.7474910 |
| H | -0.8486960 | 1.4575460  | -4.8360150 |
| H | -0.7956660 | -0.8371200 | -5.0244560 |
| H | -0.2301410 | -3.5682000 | -5.3509960 |
| H | 0.5152850  | -4.1488950 | -3.1093020 |

**B1(T)**

$E_{M06}^{el} = -578.2779957$

$ZPE_{BP86} = 0.051248$

$$E_{\text{total}} = -578.2267477$$

|   |            |            |            |
|---|------------|------------|------------|
| B | 0.0000000  | 0.0000000  | 0.7635720  |
| B | 0.0000000  | 0.0000000  | -0.7635720 |
| C | 0.0000000  | 0.0000000  | -2.2888550 |
| C | 0.0000000  | 0.0000000  | 2.2888550  |
| C | 0.0000000  | 1.1965250  | 2.9822770  |
| C | -1.1965250 | 0.0000000  | -2.9822770 |
| C | 1.1965250  | 0.0000000  | -2.9822770 |
| C | 0.0000000  | -1.1965250 | 2.9822770  |
| O | 2.2249290  | 0.0000000  | -3.4669870 |
| O | -2.2249290 | 0.0000000  | -3.4669870 |
| O | 0.0000000  | -2.2249290 | 3.4669870  |
| O | 0.0000000  | 2.2249290  | 3.4669870  |

B1

$$E^{\text{el}}_{\text{M06}} = -578.2764926$$

$$\text{ZPE}_{\text{BP86}} = 0.051264$$

$$E_{\text{total}} = -578.2252286$$

|   |           |            |            |
|---|-----------|------------|------------|
| B | 0.0000000 | 0.0000000  | 0.7651450  |
| B | 0.0000000 | 0.0000000  | -0.7651450 |
| C | 0.0000000 | 0.0000000  | -2.2533010 |
| C | 0.0000000 | 0.0000000  | 2.2533010  |
| C | 0.0000000 | 1.2253850  | 2.9153590  |
| C | 0.0000000 | -1.2253850 | -2.9153590 |
| C | 0.0000000 | 1.2253850  | -2.9153590 |
| C | 0.0000000 | -1.2253850 | 2.9153590  |
| O | 0.0000000 | 2.2860680  | -3.3232650 |
| O | 0.0000000 | -2.2860680 | -3.3232650 |
| O | 0.0000000 | -2.2860680 | 3.3232650  |
| O | 0.0000000 | 2.2860680  | 3.3232650  |



**B2(T)**

**$E_{M06}^{el} = -1029.945003$**

**$ZPE_{BP86} = 0.307834$**

**$E_{total} = -1029.637169$**

|          |                   |                   |                   |
|----------|-------------------|-------------------|-------------------|
| <b>B</b> | <b>0.0000000</b>  | <b>0.0000000</b>  | <b>0.7613010</b>  |
| <b>B</b> | <b>0.0000000</b>  | <b>0.0000000</b>  | <b>-0.7613010</b> |
| <b>C</b> | <b>0.0000000</b>  | <b>0.0000000</b>  | <b>-2.2582920</b> |
| <b>C</b> | <b>0.0000000</b>  | <b>0.0000000</b>  | <b>2.2582920</b>  |
| <b>C</b> | <b>-3.4484770</b> | <b>0.3281350</b>  | <b>-3.4060100</b> |
| <b>H</b> | <b>-2.6338120</b> | <b>-0.3458450</b> | <b>-1.5286320</b> |
| <b>C</b> | <b>-2.7949090</b> | <b>0.7183410</b>  | <b>-4.5328060</b> |
| <b>H</b> | <b>-0.7016880</b> | <b>0.9976510</b>  | <b>-4.8526780</b> |
| <b>H</b> | <b>-4.5074400</b> | <b>0.2452700</b>  | <b>-3.1954640</b> |
| <b>H</b> | <b>-3.1699580</b> | <b>1.0495200</b>  | <b>-5.4934070</b> |
| <b>C</b> | <b>3.4484770</b>  | <b>-0.3281350</b> | <b>-3.4060100</b> |
| <b>H</b> | <b>2.6338120</b>  | <b>0.3458450</b>  | <b>-1.5286320</b> |
| <b>C</b> | <b>2.7949090</b>  | <b>-0.7183410</b> | <b>-4.5328060</b> |
| <b>H</b> | <b>0.7016880</b>  | <b>-0.9976510</b> | <b>-4.8526780</b> |
| <b>H</b> | <b>4.5074400</b>  | <b>-0.2452700</b> | <b>-3.1954640</b> |
| <b>H</b> | <b>3.1699580</b>  | <b>-1.0495200</b> | <b>-5.4934070</b> |
| <b>C</b> | <b>0.7183410</b>  | <b>2.7949090</b>  | <b>4.5328060</b>  |
| <b>H</b> | <b>0.9976510</b>  | <b>0.7016880</b>  | <b>4.8526780</b>  |
| <b>C</b> | <b>0.3281350</b>  | <b>3.4484770</b>  | <b>3.4060100</b>  |
| <b>H</b> | <b>-0.3458450</b> | <b>2.6338120</b>  | <b>1.5286320</b>  |
| <b>H</b> | <b>1.0495200</b>  | <b>3.1699580</b>  | <b>5.4934070</b>  |
| <b>H</b> | <b>0.2452700</b>  | <b>4.5074400</b>  | <b>3.1954640</b>  |
| <b>C</b> | <b>-0.7183410</b> | <b>-2.7949090</b> | <b>4.5328060</b>  |
| <b>H</b> | <b>-0.9976510</b> | <b>-0.7016880</b> | <b>4.8526780</b>  |
| <b>C</b> | <b>-0.3281350</b> | <b>-3.4484770</b> | <b>3.4060100</b>  |

|   |            |            |            |
|---|------------|------------|------------|
| H | 0.3458450  | -2.6338120 | 1.5286320  |
| H | -1.0495200 | -3.1699580 | 5.4934070  |
| H | -0.2452700 | -4.5074400 | 3.1954640  |
| C | 0.1830000  | 1.2242890  | 2.9773540  |
| C | -0.1830000 | -1.2242890 | 2.9773540  |
| C | 1.2242890  | -0.1830000 | -2.9773540 |
| C | -1.2242890 | 0.1830000  | -2.9773540 |
| N | 0.6132850  | 1.4316390  | 4.2613520  |
| N | 0.0000000  | 2.4749410  | 2.4717720  |
| N | 0.0000000  | -2.4749410 | 2.4717720  |
| N | -0.6132850 | -1.4316390 | 4.2613520  |
| N | -1.4316390 | 0.6132850  | -4.2613520 |
| N | -2.4749410 | 0.0000000  | -2.4717720 |
| N | 1.4316390  | -0.6132850 | -4.2613520 |
| N | 2.4749410  | 0.0000000  | -2.4717720 |

**B2**

$E_{M06}^{el} = -1029.954739$

$ZPE_{BP86} = 0.308825$

$E_{total} = -1029.645914$

|   |            |            |            |
|---|------------|------------|------------|
| B | 0.0000130  | 0.7567460  | 0.0001020  |
| B | -0.0000130 | -0.7567460 | 0.0001020  |
| C | -0.0000130 | -2.2348940 | 0.0000430  |
| C | 0.0000130  | 2.2348940  | 0.0000430  |
| C | -1.2398800 | 2.9682850  | -0.0517590 |
| C | 1.2399010  | 2.9682950  | 0.0517850  |
| C | 1.2398800  | -2.9682850 | -0.0517590 |
| C | -1.2399010 | -2.9682950 | 0.0517850  |
| C | -3.4377480 | -3.3989360 | 0.3813260  |
| C | -2.8886810 | -4.5118810 | -0.1795690 |

|   |            |            |            |
|---|------------|------------|------------|
| C | -3.4377320 | 3.3988790  | -0.3813220 |
| C | -2.8886660 | 4.5118850  | 0.1794530  |
| C | 2.8886810  | 4.5118810  | -0.1795690 |
| C | 3.4377480  | 3.3989360  | 0.3813260  |
| C | 3.4377320  | -3.3988790 | -0.3813220 |
| C | 2.8886660  | -4.5118850 | 0.1794530  |
| H | -4.4522670 | 3.1968140  | -0.7015610 |
| H | -3.3296690 | 5.4624110  | 0.4540840  |
| H | 3.3296820  | 5.4623800  | -0.4542940 |
| H | 4.4522810  | 3.1969090  | 0.7015970  |
| H | 4.4522670  | -3.1968140 | -0.7015610 |
| H | 3.3296690  | -5.4624110 | 0.4540840  |
| H | -3.3296820 | -5.4623800 | -0.4542940 |
| H | -4.4522810 | -3.1969090 | 0.7015970  |
| N | 2.4125320  | -2.4767950 | -0.5207890 |
| N | 1.5360100  | -4.2357520 | 0.3640570  |
| N | -1.5360290 | -4.2357210 | -0.3641590 |
| N | -2.4125520 | -2.4768590 | 0.5208760  |
| N | 1.5360290  | 4.2357210  | -0.3641590 |
| N | 2.4125520  | 2.4768590  | 0.5208760  |
| N | -1.5360100 | 4.2357520  | 0.3640570  |
| N | -2.4125320 | 2.4767950  | -0.5207890 |
| H | -0.8999210 | 4.8232590  | 0.8942870  |
| H | 0.8999430  | 4.8231680  | -0.8944580 |
| H | 2.4683680  | 1.5269760  | 0.8886280  |
| H | -2.4683430 | 1.5268700  | -0.8884370 |
| H | -2.4683680 | -1.5269760 | 0.8886280  |
| H | -0.8999430 | -4.8231680 | -0.8944580 |
| H | 0.8999210  | -4.8232590 | 0.8942870  |
| H | 2.4683430  | -1.5268700 | -0.8884370 |

**B3(T)**

|          |                   |                   |                   |
|----------|-------------------|-------------------|-------------------|
| <b>B</b> | <b>0.0000000</b>  | <b>0.0000000</b>  | <b>0.7698240</b>  |
| <b>B</b> | <b>0.0000000</b>  | <b>0.0000000</b>  | <b>-0.7698240</b> |
| <b>C</b> | <b>0.0000000</b>  | <b>0.0000000</b>  | <b>2.2579110</b>  |
| <b>C</b> | <b>0.0000000</b>  | <b>0.0000000</b>  | <b>-2.2579110</b> |
| <b>P</b> | <b>-1.1263970</b> | <b>1.1264670</b>  | <b>-2.9999770</b> |
| <b>P</b> | <b>1.1263970</b>  | <b>-1.1264670</b> | <b>-2.9999770</b> |
| <b>P</b> | <b>-1.1263970</b> | <b>-1.1264670</b> | <b>2.9999770</b>  |
| <b>P</b> | <b>1.1263970</b>  | <b>1.1264670</b>  | <b>2.9999770</b>  |
| <b>C</b> | <b>-0.7782300</b> | <b>2.8310710</b>  | <b>-2.4760150</b> |
| <b>H</b> | <b>0.2069150</b>  | <b>3.1388710</b>  | <b>-2.8494120</b> |
| <b>H</b> | <b>-1.5456000</b> | <b>3.5154000</b>  | <b>-2.8625830</b> |
| <b>H</b> | <b>-0.7734740</b> | <b>2.8717090</b>  | <b>-1.3792670</b> |
| <b>C</b> | <b>-1.1681070</b> | <b>1.1689380</b>  | <b>-4.8164580</b> |
| <b>H</b> | <b>-1.9167200</b> | <b>1.9156090</b>  | <b>-5.1163290</b> |
| <b>H</b> | <b>-0.1988810</b> | <b>1.4705050</b>  | <b>-5.2306260</b> |
| <b>H</b> | <b>-1.4664300</b> | <b>0.1991410</b>  | <b>-5.2315710</b> |
| <b>C</b> | <b>-2.8310710</b> | <b>0.7780350</b>  | <b>-2.4764940</b> |
| <b>H</b> | <b>-2.8721520</b> | <b>0.7740510</b>  | <b>-1.3797490</b> |
| <b>H</b> | <b>-3.5156240</b> | <b>1.5448240</b>  | <b>-2.8637970</b> |
| <b>H</b> | <b>-3.1383150</b> | <b>-0.2075800</b> | <b>-2.8491140</b> |
| <b>C</b> | <b>1.1681070</b>  | <b>-1.1689380</b> | <b>-4.8164580</b> |
| <b>H</b> | <b>0.1988810</b>  | <b>-1.4705050</b> | <b>-5.2306260</b> |
| <b>H</b> | <b>1.4664300</b>  | <b>-0.1991410</b> | <b>-5.2315710</b> |
| <b>H</b> | <b>1.9167200</b>  | <b>-1.9156090</b> | <b>-5.1163290</b> |
| <b>C</b> | <b>0.7782300</b>  | <b>-2.8310710</b> | <b>-2.4760150</b> |
| <b>H</b> | <b>0.7734740</b>  | <b>-2.8717090</b> | <b>-1.3792670</b> |
| <b>H</b> | <b>-0.2069150</b> | <b>-3.1388710</b> | <b>-2.8494120</b> |
| <b>H</b> | <b>1.5456000</b>  | <b>-3.5154000</b> | <b>-2.8625830</b> |

|   |            |            |            |
|---|------------|------------|------------|
| C | 2.8310710  | -0.7780350 | -2.4764940 |
| H | 3.1383150  | 0.2075800  | -2.8491140 |
| H | 2.8721520  | -0.7740510 | -1.3797490 |
| H | 3.5156240  | -1.5448240 | -2.8637970 |
| C | -1.1681070 | -1.1689380 | 4.8164580  |
| H | -0.1988810 | -1.4705050 | 5.2306260  |
| H | -1.4664300 | -0.1991410 | 5.2315710  |
| H | -1.9167200 | -1.9156090 | 5.1163290  |
| C | -0.7782300 | -2.8310710 | 2.4760150  |
| H | -0.7734740 | -2.8717090 | 1.3792670  |
| H | 0.2069150  | -3.1388710 | 2.8494120  |
| H | -1.5456000 | -3.5154000 | 2.8625830  |
| C | 1.1681070  | 1.1689380  | 4.8164580  |
| H | 1.4664300  | 0.1991410  | 5.2315710  |
| H | 1.9167200  | 1.9156090  | 5.1163290  |
| H | 0.1988810  | 1.4705050  | 5.2306260  |
| C | 2.8310710  | 0.7780350  | 2.4764940  |
| H | 2.8721520  | 0.7740510  | 1.3797490  |
| H | 3.5156240  | 1.5448240  | 2.8637970  |
| H | 3.1383150  | -0.2075800 | 2.8491140  |
| C | 0.7782300  | 2.8310710  | 2.4760150  |
| H | -0.2069150 | 3.1388710  | 2.8494120  |
| H | 1.5456000  | 3.5154000  | 2.8625830  |
| H | 0.7734740  | 2.8717090  | 1.3792670  |
| C | -2.8310710 | -0.7780350 | 2.4764940  |
| H | -3.5156240 | -1.5448240 | 2.8637970  |
| H | -3.1383150 | 0.2075800  | 2.8491140  |
| H | -2.8721520 | -0.7740510 | 1.3797490  |

**B3**

$E_{M06}^{el} = -1969.533922$

$ZPE_{BP86} = 0.465129$

$E_{total} = -1969.068793$

|          |                   |                   |                   |
|----------|-------------------|-------------------|-------------------|
| <b>B</b> | <b>0.0000000</b>  | <b>0.0000000</b>  | <b>0.7642070</b>  |
| <b>B</b> | <b>0.0000000</b>  | <b>0.0000000</b>  | <b>-0.7642070</b> |
| <b>C</b> | <b>0.0000000</b>  | <b>0.0000000</b>  | <b>2.2282470</b>  |
| <b>C</b> | <b>0.0000000</b>  | <b>0.0000000</b>  | <b>-2.2282470</b> |
| <b>P</b> | <b>-0.0035580</b> | <b>1.5975570</b>  | <b>-2.9991020</b> |
| <b>P</b> | <b>0.0035580</b>  | <b>-1.5975570</b> | <b>-2.9991020</b> |
| <b>P</b> | <b>-0.0035580</b> | <b>-1.5975570</b> | <b>2.9991020</b>  |
| <b>P</b> | <b>0.0035580</b>  | <b>1.5975570</b>  | <b>2.9991020</b>  |
| <b>C</b> | <b>1.2659470</b>  | <b>2.6472490</b>  | <b>-2.2434110</b> |
| <b>H</b> | <b>2.2609500</b>  | <b>2.2508160</b>  | <b>-2.4842910</b> |
| <b>H</b> | <b>1.1802250</b>  | <b>3.6756770</b>  | <b>-2.6192480</b> |
| <b>H</b> | <b>1.1262760</b>  | <b>2.6294950</b>  | <b>-1.1553960</b> |
| <b>C</b> | <b>0.3306400</b>  | <b>1.6474640</b>  | <b>-4.7881380</b> |
| <b>H</b> | <b>0.3809600</b>  | <b>2.7001130</b>  | <b>-5.0995820</b> |
| <b>H</b> | <b>1.2941200</b>  | <b>1.1745650</b>  | <b>-5.0172580</b> |
| <b>H</b> | <b>-0.4679530</b> | <b>1.1598990</b>  | <b>-5.3589400</b> |
| <b>C</b> | <b>-1.6006140</b> | <b>2.4280090</b>  | <b>-2.7639210</b> |
| <b>H</b> | <b>-1.8360400</b> | <b>2.4444680</b>  | <b>-1.6922880</b> |
| <b>H</b> | <b>-1.5634660</b> | <b>3.4558580</b>  | <b>-3.1495770</b> |
| <b>H</b> | <b>-2.3887450</b> | <b>1.8729460</b>  | <b>-3.2893920</b> |
| <b>C</b> | <b>-0.3306400</b> | <b>-1.6474640</b> | <b>-4.7881380</b> |
| <b>H</b> | <b>-1.2941200</b> | <b>-1.1745650</b> | <b>-5.0172580</b> |
| <b>H</b> | <b>0.4679530</b>  | <b>-1.1598990</b> | <b>-5.3589400</b> |
| <b>H</b> | <b>-0.3809600</b> | <b>-2.7001130</b> | <b>-5.0995820</b> |
| <b>C</b> | <b>-1.2659470</b> | <b>-2.6472490</b> | <b>-2.2434110</b> |
| <b>H</b> | <b>-1.1262760</b> | <b>-2.6294950</b> | <b>-1.1553960</b> |

|   |            |            |            |
|---|------------|------------|------------|
| H | -2.2609500 | -2.2508160 | -2.4842910 |
| H | -1.1802250 | -3.6756770 | -2.6192480 |
| C | 1.6006140  | -2.4280090 | -2.7639210 |
| H | 2.3887450  | -1.8729460 | -3.2893920 |
| H | 1.8360400  | -2.4444680 | -1.6922880 |
| H | 1.5634660  | -3.4558580 | -3.1495770 |
| C | 0.3306400  | -1.6474640 | 4.7881380  |
| H | 1.2941200  | -1.1745650 | 5.0172580  |
| H | -0.4679530 | -1.1598990 | 5.3589400  |
| H | 0.3809600  | -2.7001130 | 5.0995820  |
| C | 1.2659470  | -2.6472490 | 2.2434110  |
| H | 1.1262760  | -2.6294950 | 1.1553960  |
| H | 2.2609500  | -2.2508160 | 2.4842910  |
| H | 1.1802250  | -3.6756770 | 2.6192480  |
| C | -0.3306400 | 1.6474640  | 4.7881380  |
| H | 0.4679530  | 1.1598990  | 5.3589400  |
| H | -0.3809600 | 2.7001130  | 5.0995820  |
| H | -1.2941200 | 1.1745650  | 5.0172580  |
| C | 1.6006140  | 2.4280090  | 2.7639210  |
| H | 1.8360400  | 2.4444680  | 1.6922880  |
| H | 1.5634660  | 3.4558580  | 3.1495770  |
| H | 2.3887450  | 1.8729460  | 3.2893920  |
| C | -1.2659470 | 2.6472490  | 2.2434110  |
| H | -2.2609500 | 2.2508160  | 2.4842910  |
| H | -1.1802250 | 3.6756770  | 2.6192480  |
| H | -1.1262760 | 2.6294950  | 1.1553960  |
| C | -1.6006140 | -2.4280090 | 2.7639210  |
| H | -1.5634660 | -3.4558580 | 3.1495770  |
| H | -2.3887450 | -1.8729460 | 3.2893920  |
| H | -1.8360400 | -2.4444680 | 1.6922880  |
